# Supplementary material
Source: PubMed Central journal article supplement (PMC2754322)

# SUPPORTING INFORMATION FOR

## Carteriosulfonic Acids A-C, GSK-3 $\beta$ Inhibitors from a *Carteriospongia* sp.

*Malcolm W. B. McCulloch,<sup>†</sup> Tim S. Bugni,<sup>†</sup> Gisela P. Concepcion,<sup>‡</sup> Gary S. Coombs,<sup>§</sup> Mary Kay Harper,<sup>†</sup> Simran Kaur,<sup>§</sup> Gina C. Mangalindan,<sup>‡</sup> Misha M. Mutizwa,<sup>§</sup> Charles A. Veltri,<sup>†</sup> David M. Virshup,<sup>§</sup> Chris M. Ireland<sup>†,\*</sup>*

Department of Medicinal Chemistry, University of Utah, Salt Lake City, Utah 84112, USA. Marine Science Institute, University of the Philippines, Diliman 1101, Quezon City, Philippines. Duke NUS Graduate Medical School, Singapore, 169547

\*Corresponding author. Tel.: +1-801-581-8305; fax: +1-801-585-6208; e-mail: [cireland@pharm.utah.edu](mailto:cireland@pharm.utah.edu)

<sup>†</sup>University of Utah. <sup>‡</sup>University of the Philippines. <sup>§</sup>Duke NUS Graduate Medical School.

## Supporting information

The following supporting information is provided:

Figure S1.  $^1\text{H}$  NMR (600 MHz,  $\text{DMSO-d}_6$ ) of carteriosulfonic acid A (**1**)

Figure S2. gHMBC (600 MHz,  $\text{DMSO-d}_6$ ) of carteriosulfonic acid A (**1**)

Figure S3.  $^1\text{H}$  NMR (600 MHz,  $\text{DMSO-d}_6$ ) of carteriosulfonic acid B (**2**)

Figure S4. gHMBC (600 MHz,  $\text{DMSO-d}_6$ ) of carteriosulfonic acid B (**2**)

Figure S5.  $^1\text{H}$  NMR (600 MHz,  $\text{DMSO-d}_6$ ) of carteriosulfonic acid C (**3**)

Figure S6. gHMBC (600 MHz,  $\text{DMSO-d}_6$ ) of carteriosulfonic acid C (**3**)

Figure S7.  $^1\text{H}$  NMR (500 MHz,  $\text{CD}_3\text{OD}$ ) of desacyl-carteriosulfonic acid (**7**)

Figure S8.  $^{13}\text{C}$  NMR (125 MHz,  $\text{CD}_3\text{OD}$ ) of desacyl-carteriosulfonic acid (**7**)

Figure S9.  $^1\text{H}$  NMR (500 MHz,  $\text{CDCl}_3$ ) of **11**

Figure S10. gHSQC NMR (500 MHz,  $\text{CDCl}_3$ ) of **11**

Figure S11. gHMBC NMR (500 MHz,  $\text{CDCl}_3$ ) of **11**

Figure S12.  $^1\text{H}$  NMR (500 MHz,  $\text{CDCl}_3$ ) of **12**

Figure S13. gHSQC NMR (500 MHz,  $\text{CDCl}_3$ ) of **12**

Figure S14. Dose response of carteriosulfonic acids A, B and C against GSK-3 $\beta$

Figure S1.  $^1\text{H}$  NMR (600 MHz,  $\text{DMSO-d}_6$ ) of carteriosulfonic acid A (1)

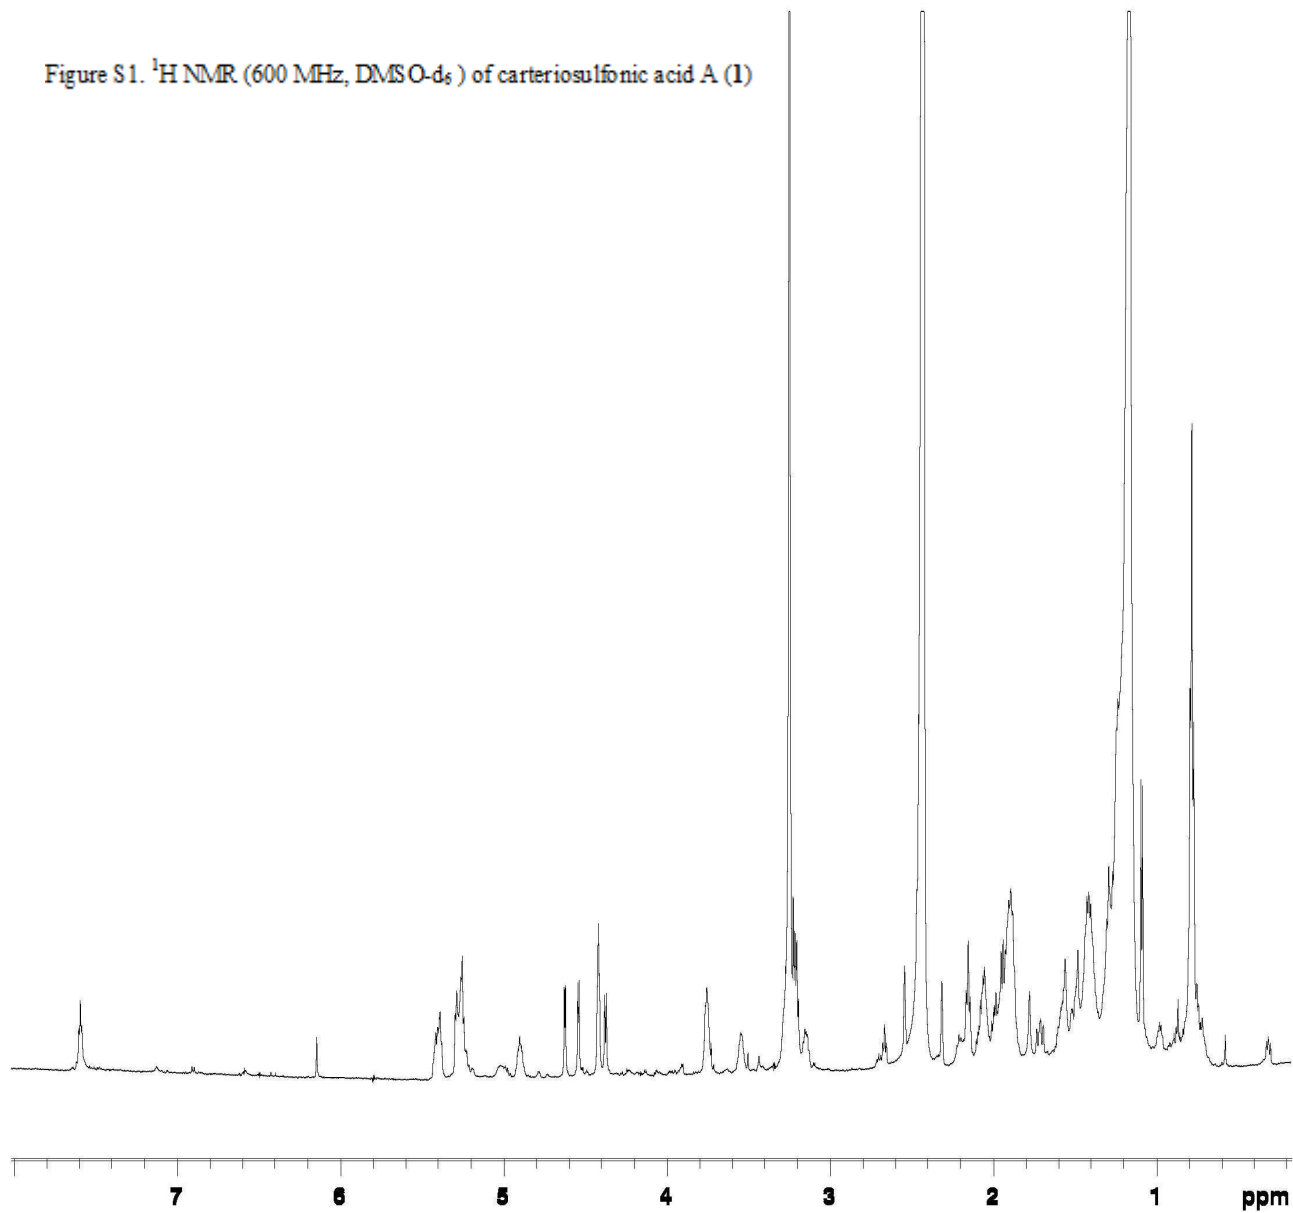

Figure S2. gHMBC (600 MHz, DMSO-d<sub>6</sub>) of carteriosulfonic acid A (1)

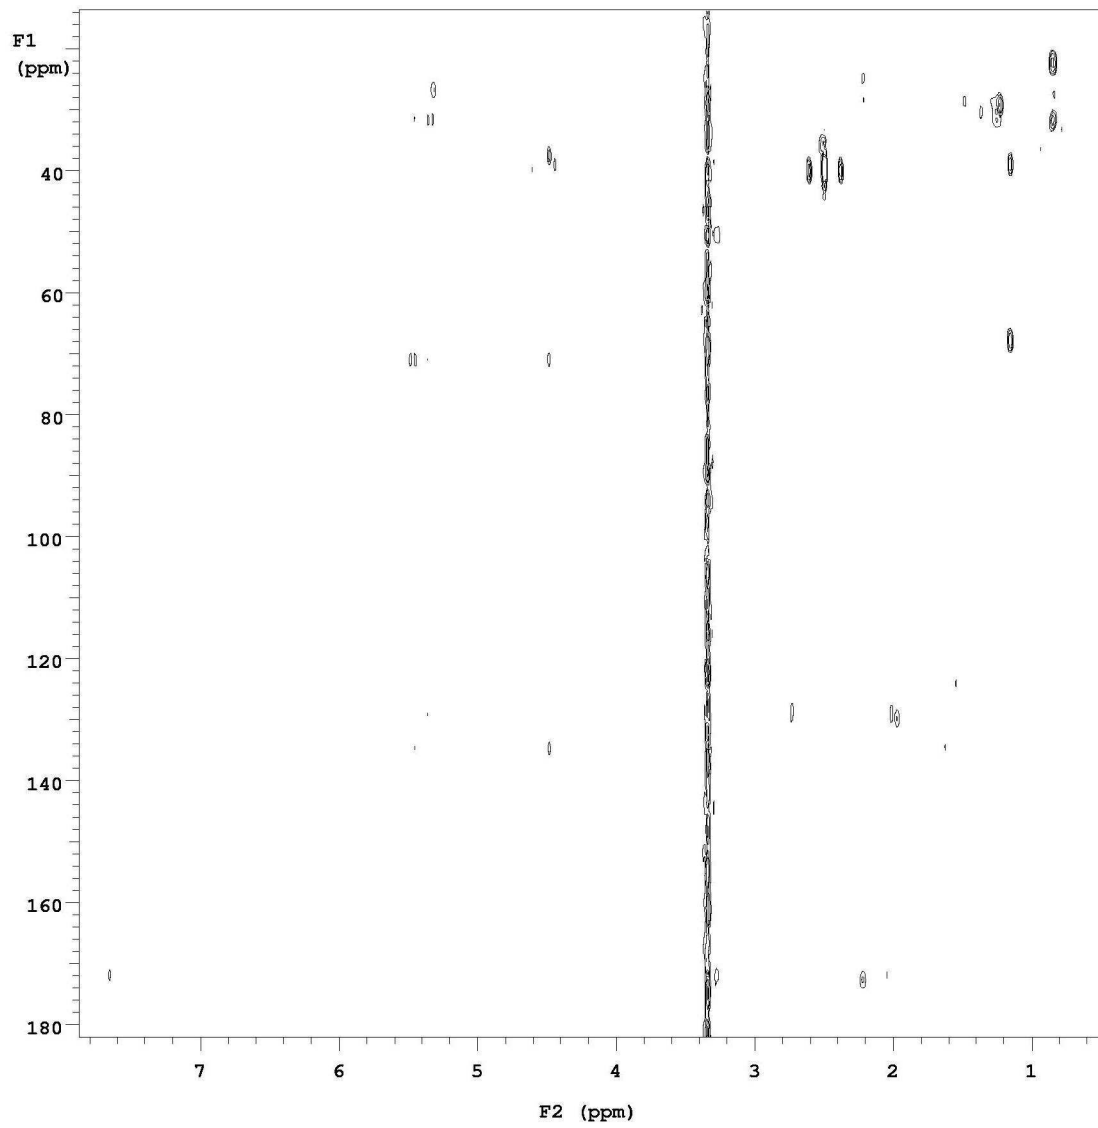

Figure S3.  $^1\text{H}$  NMR (600 MHz,  $\text{DMSO-d}_6$ ) of carteriosulfonic acid B (2)

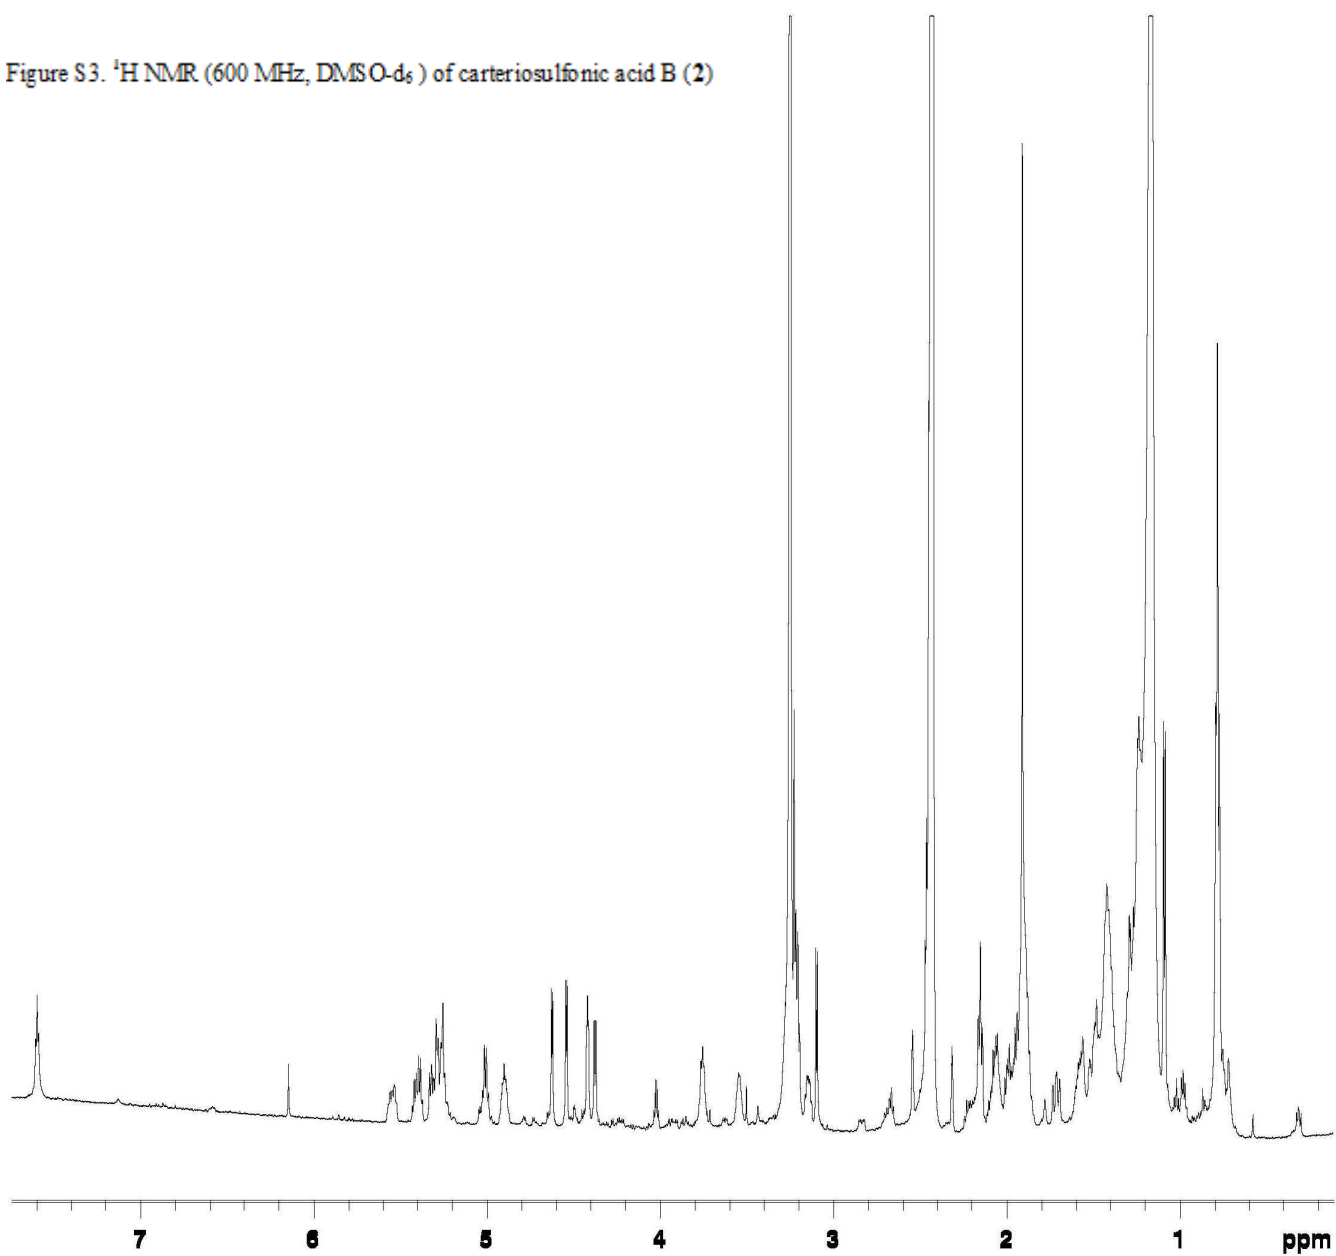

Figure S4. gHMBC (600 MHz, DMSO-d<sub>6</sub>) of carteriosulfonic acid B (2)

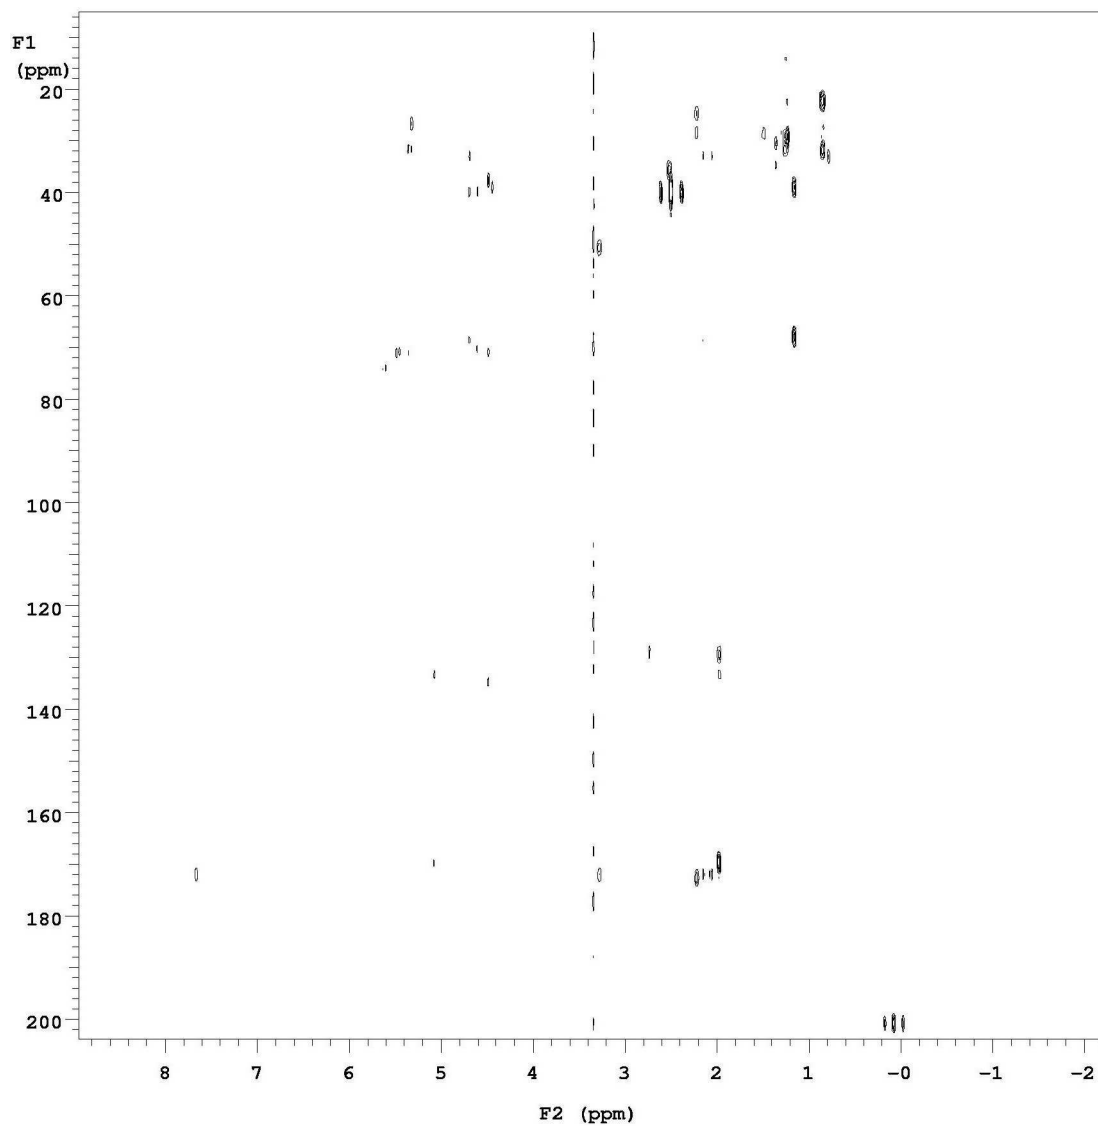

Figure S5.  $^1\text{H}$  NMR (600 MHz,  $\text{DMSO-d}_6$ ) of carteriosulfonic acid C (3)

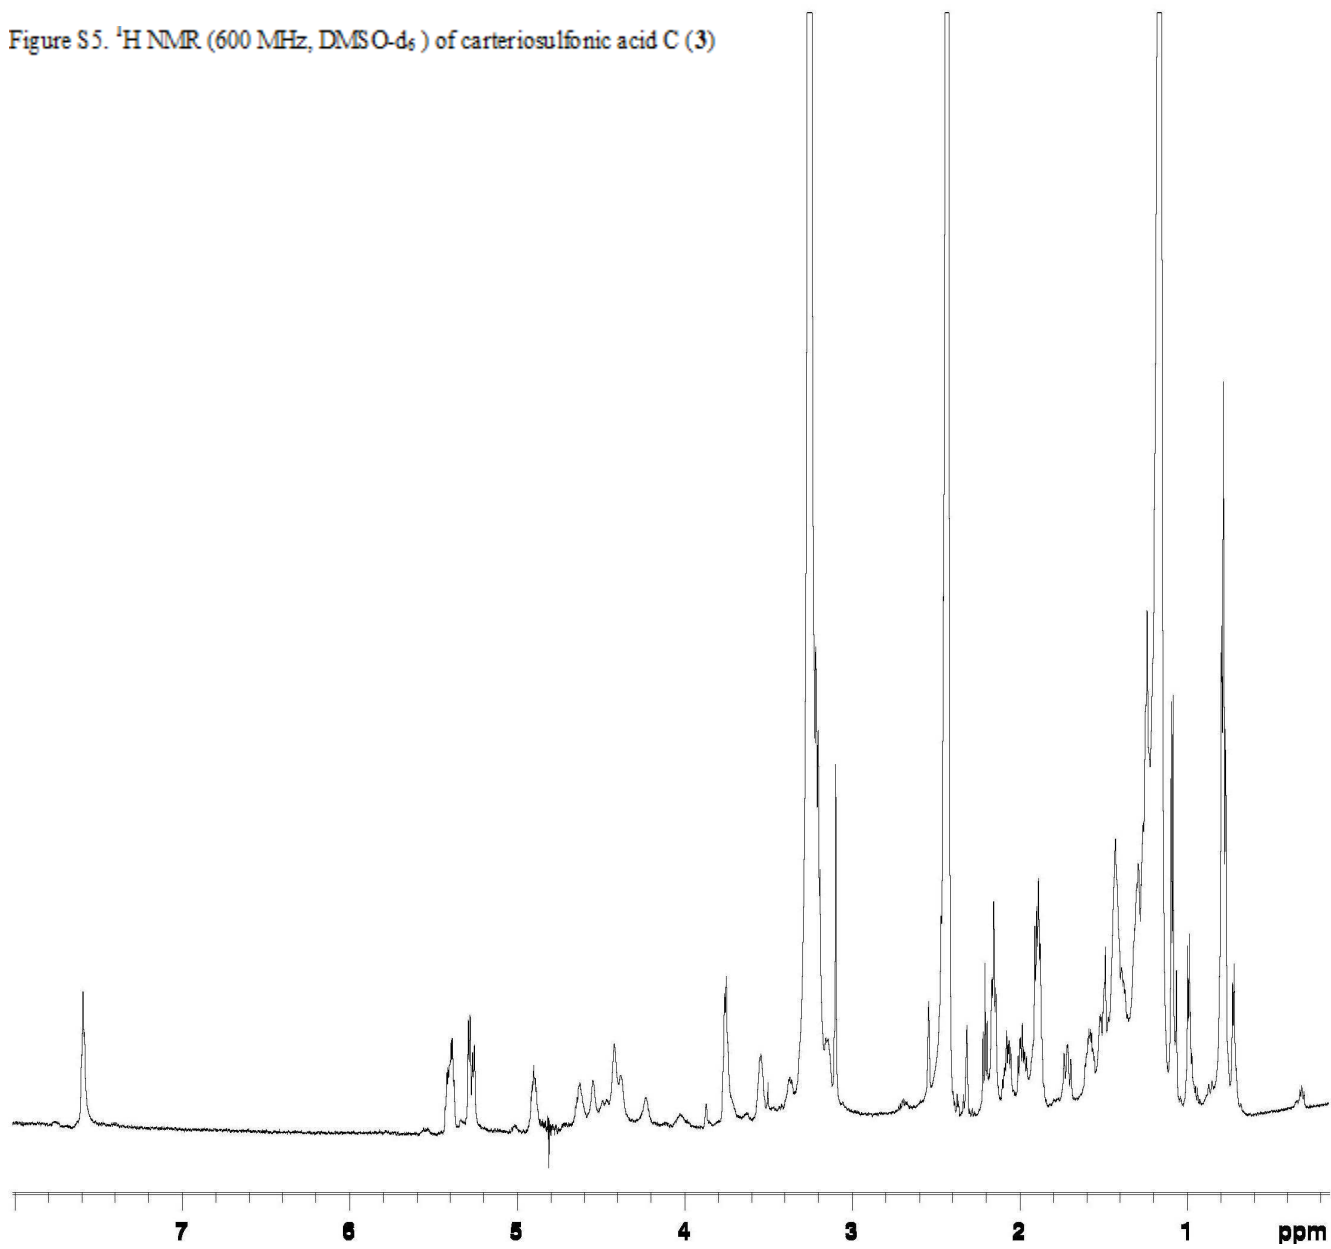

Figure S6. gHMBC (600 MHz, DMSO-d<sub>6</sub>) of carteriosulfonic acid C (3)

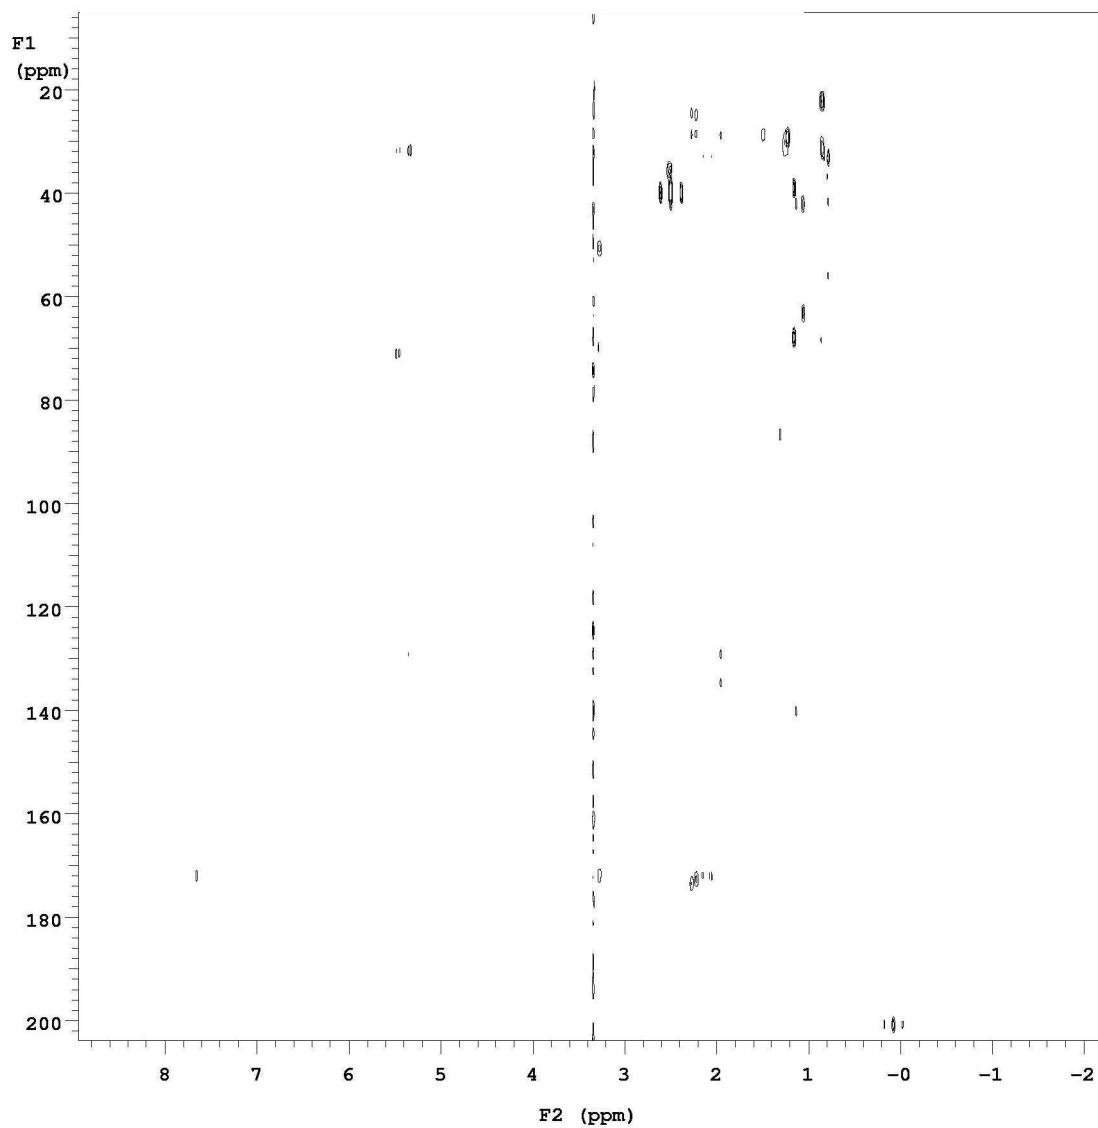



Figure S7.  $^1\text{H}$  NMR (500 MHz,  $\text{CD}_3\text{OD}$ ) of desacyl-carteriosulfonic acid (7)

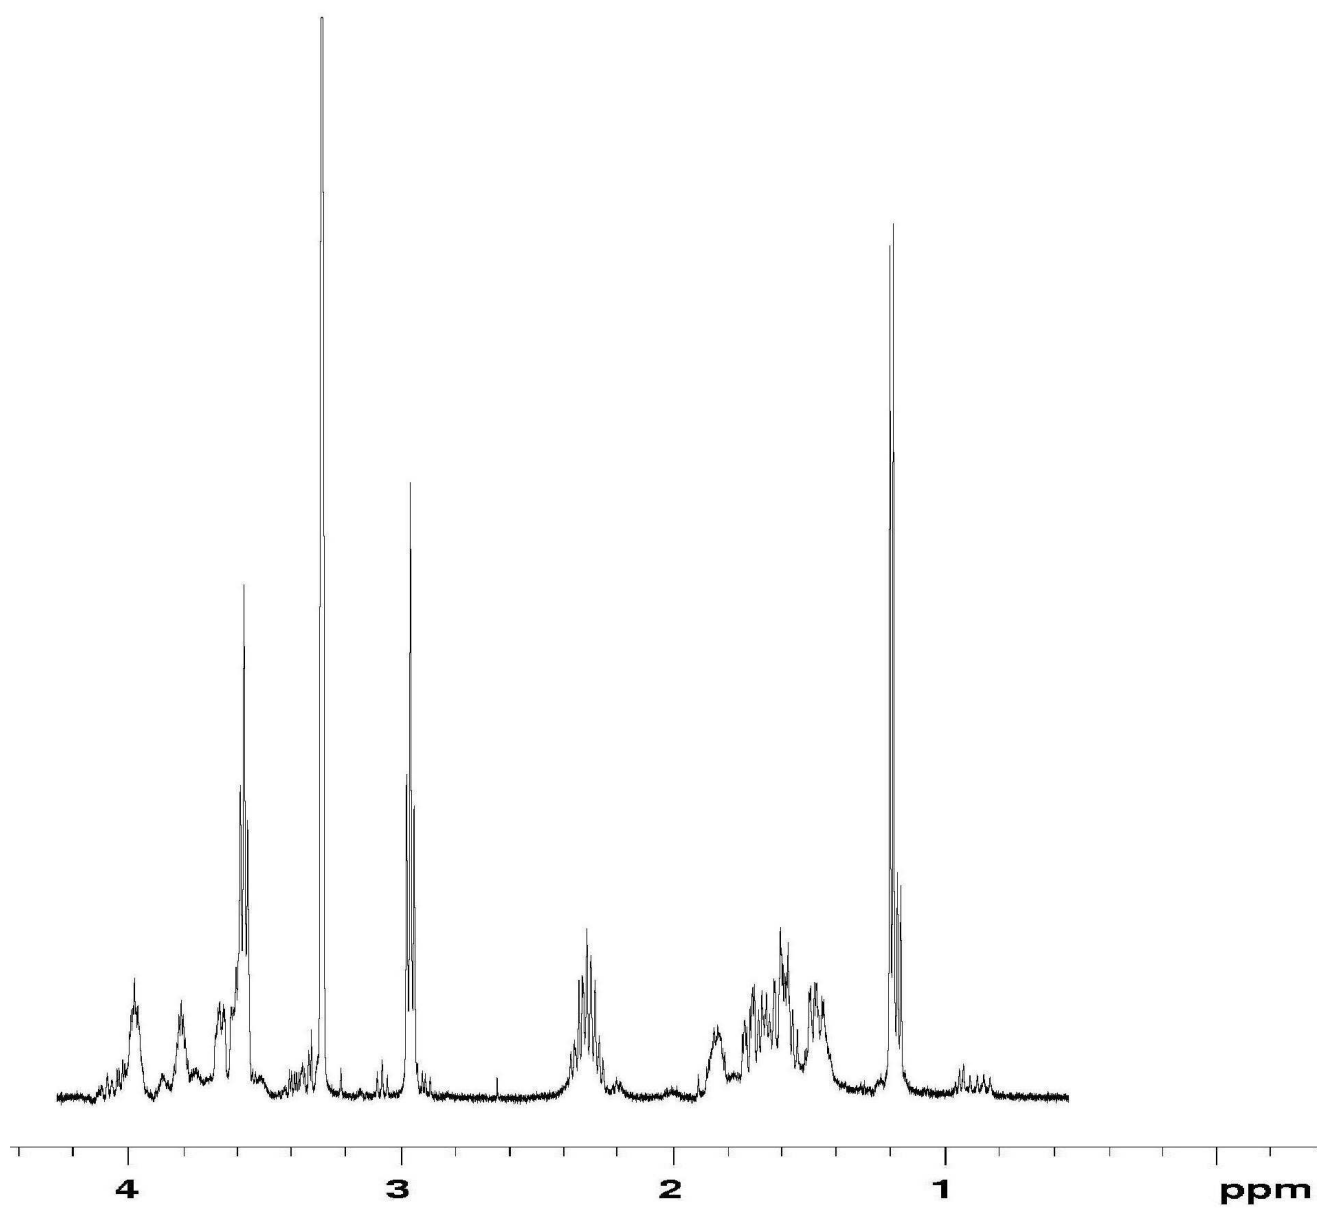

Figure S8.  $^{13}\text{C}$  NMR (125 MHz,  $\text{CD}_3\text{OD}$ ) of desacyl-carteriosulfonic acid (7)

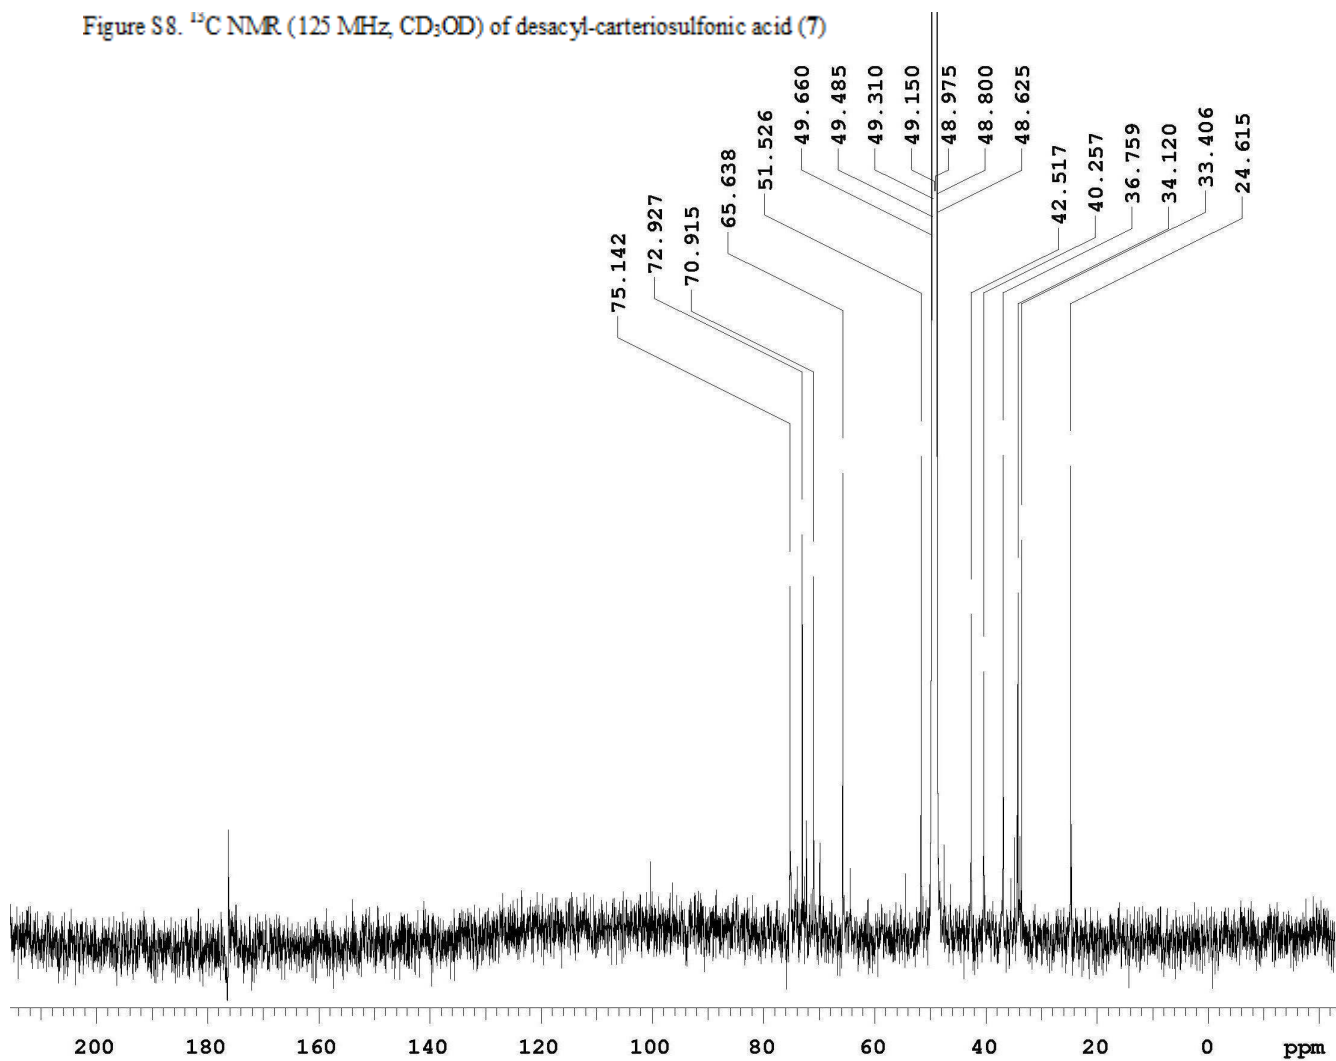

Figure S9.  $^1\text{H}$  NMR (500 MHz,  $\text{CDCl}_3$ ) of **11**

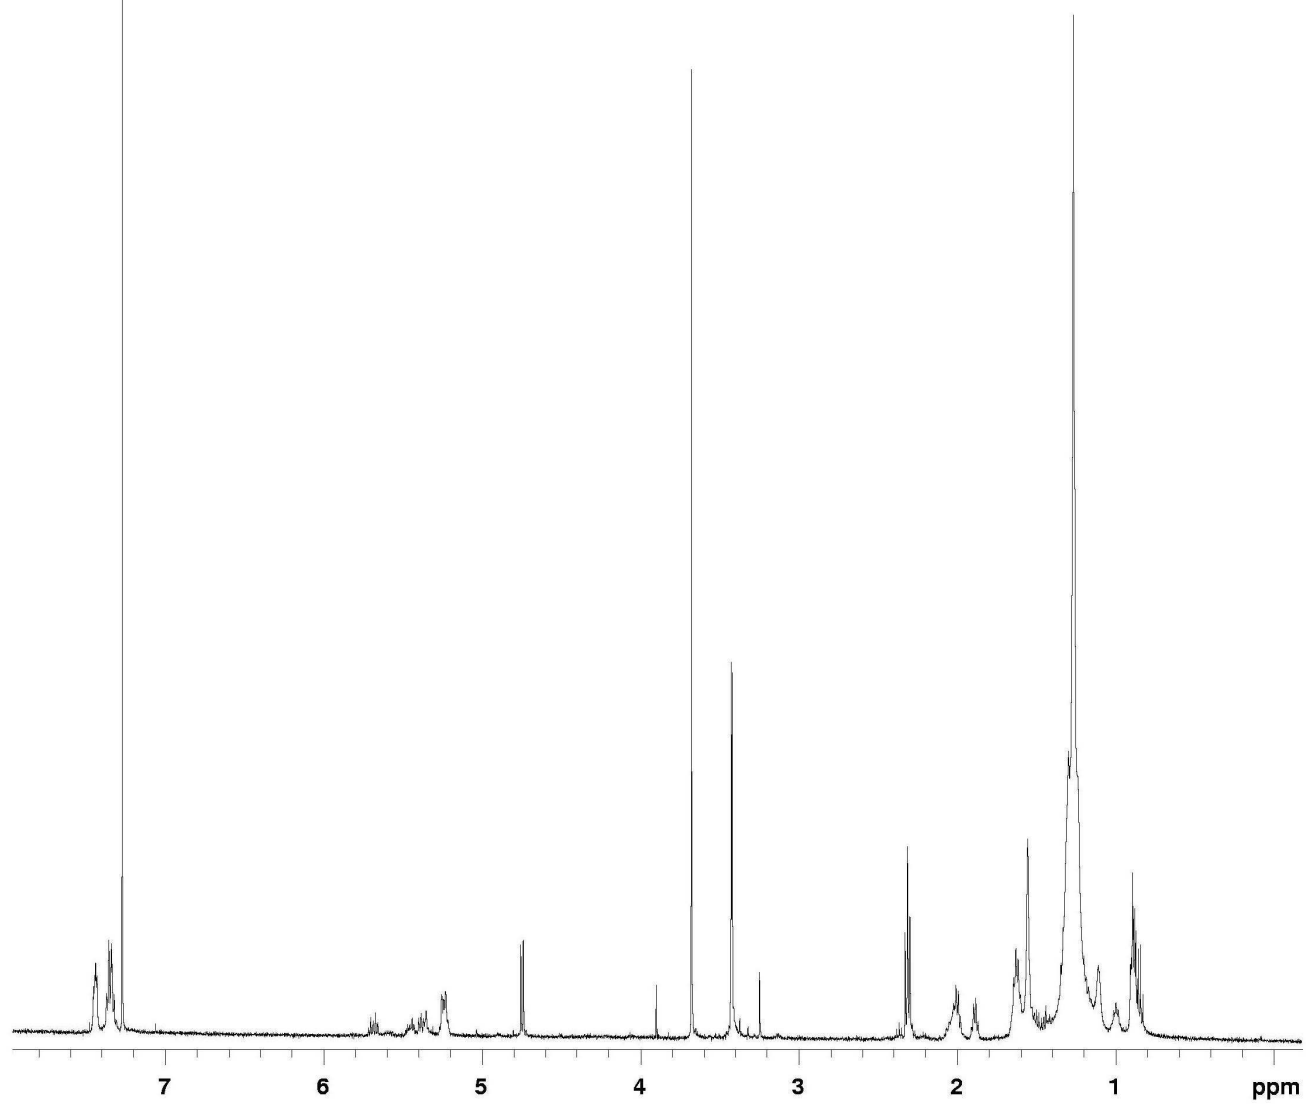

Figure S10. gHSQC NMR (500 MHz, CDCl<sub>3</sub>) of 11

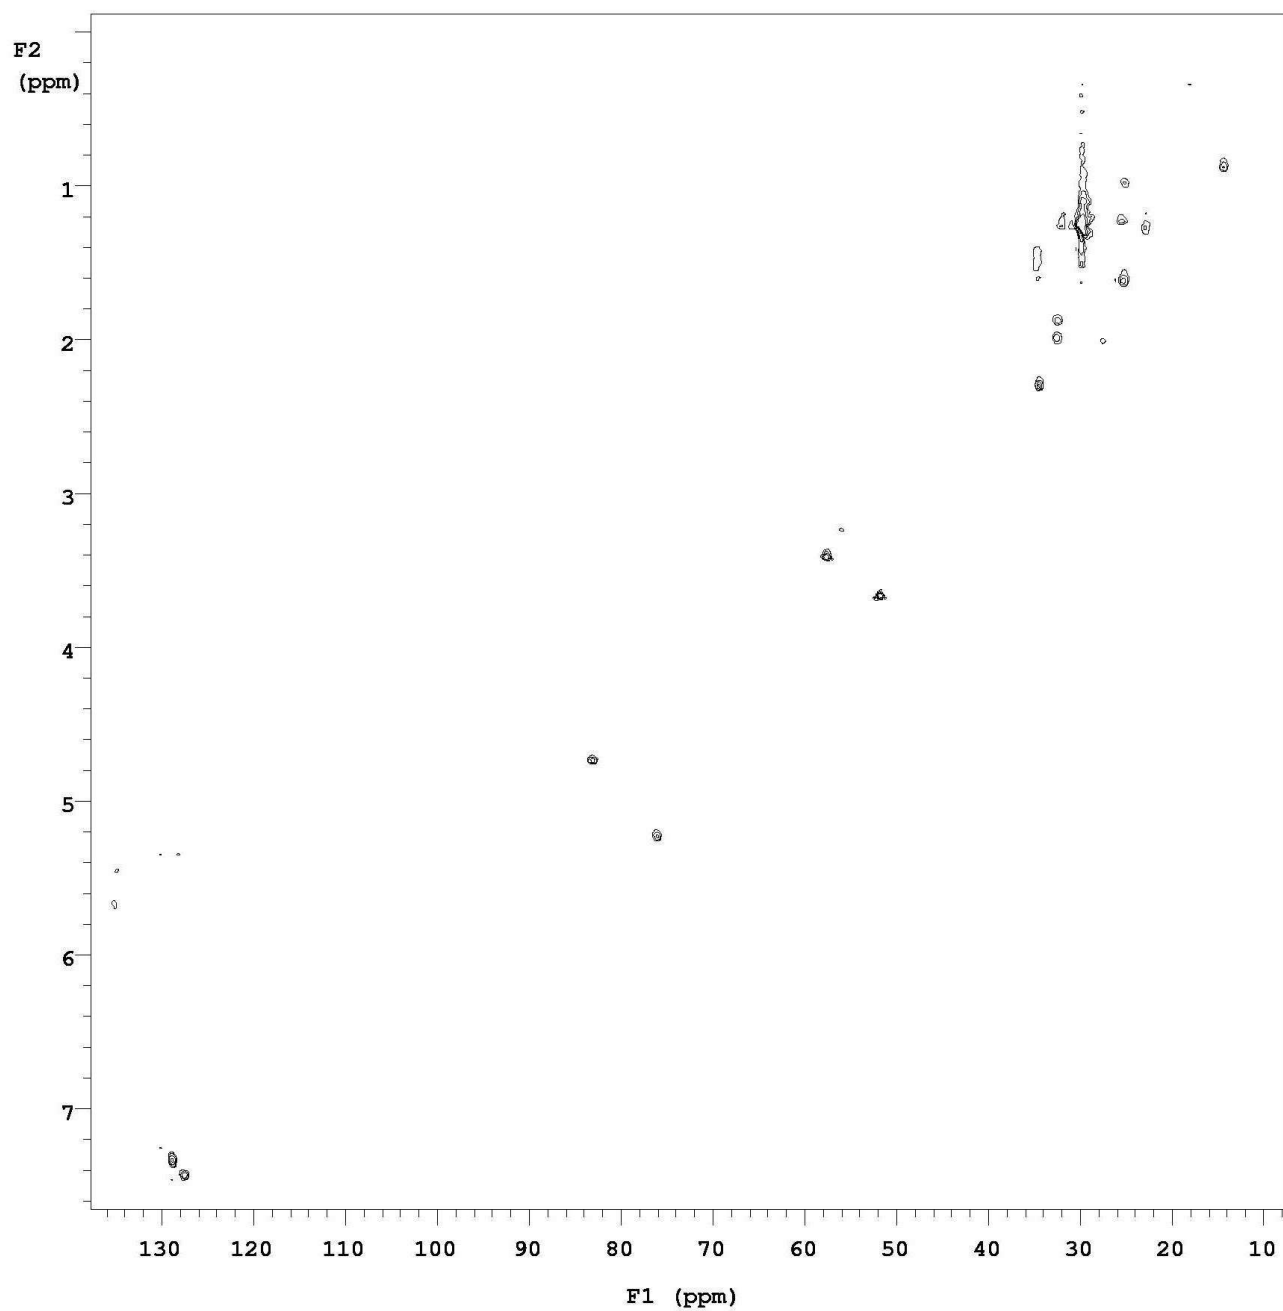

Figure S11. gHMBC NMR (500 MHz, CDCl<sub>3</sub>) of 11

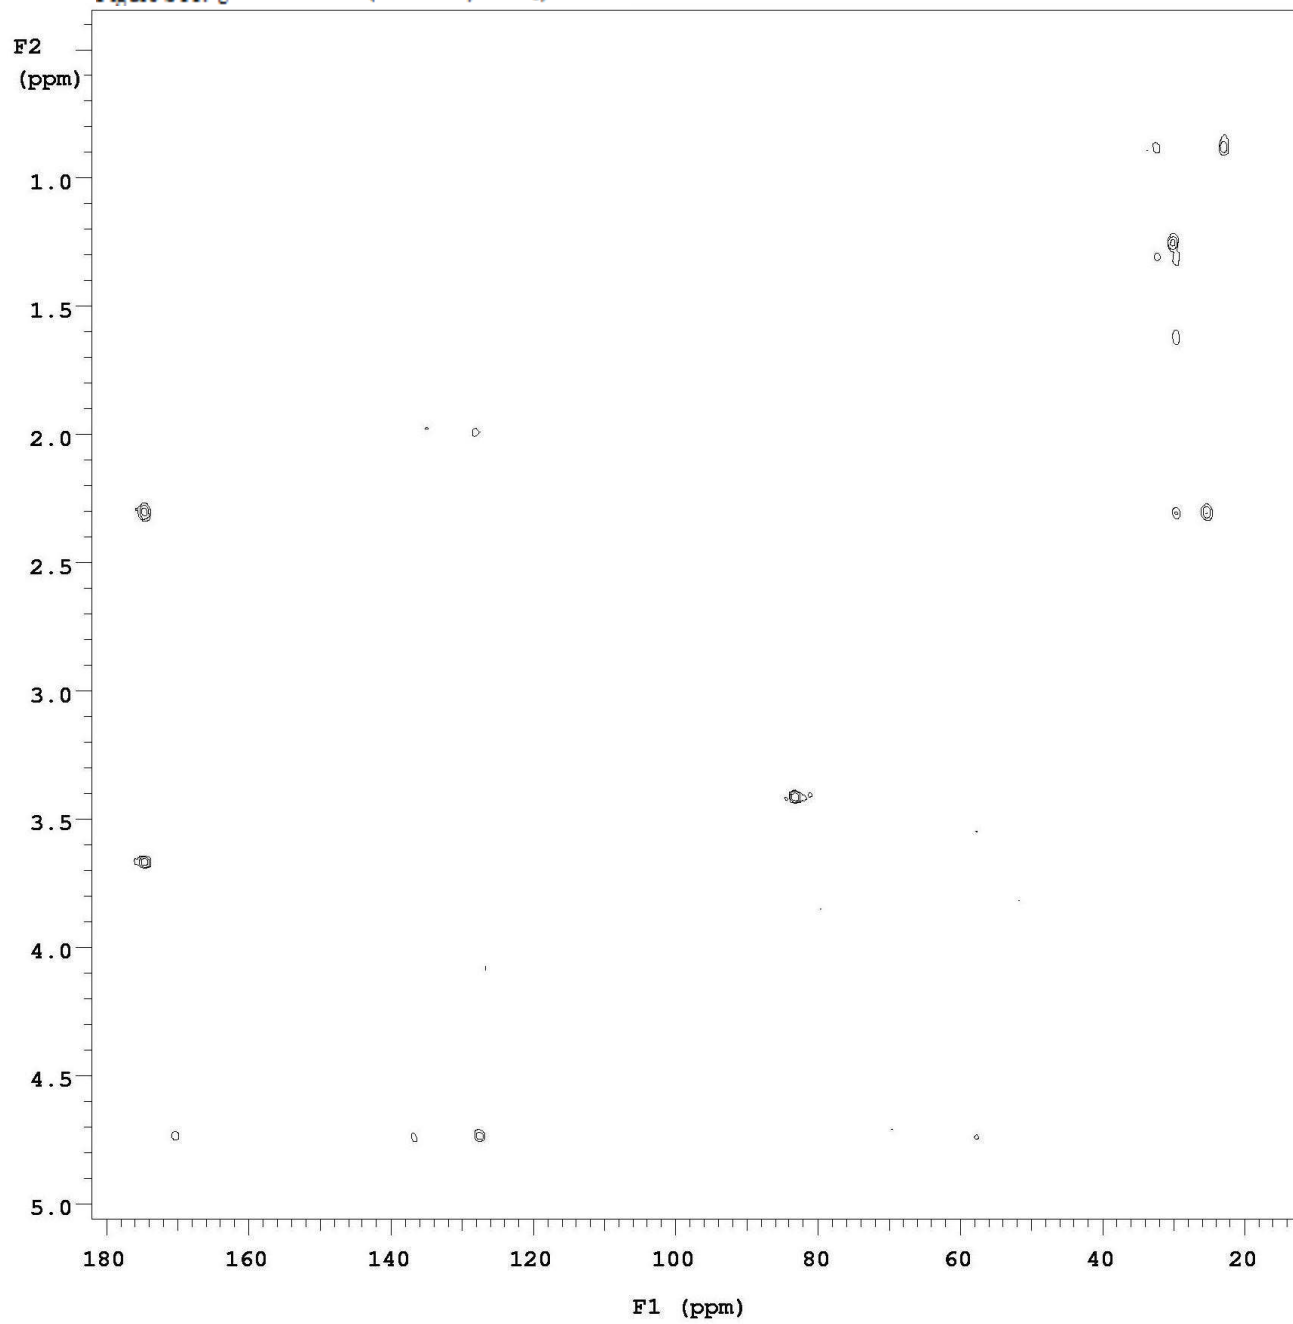

Figure S12.  $^1\text{H}$  NMR (500 MHz,  $\text{CDCl}_3$ ) of **12**

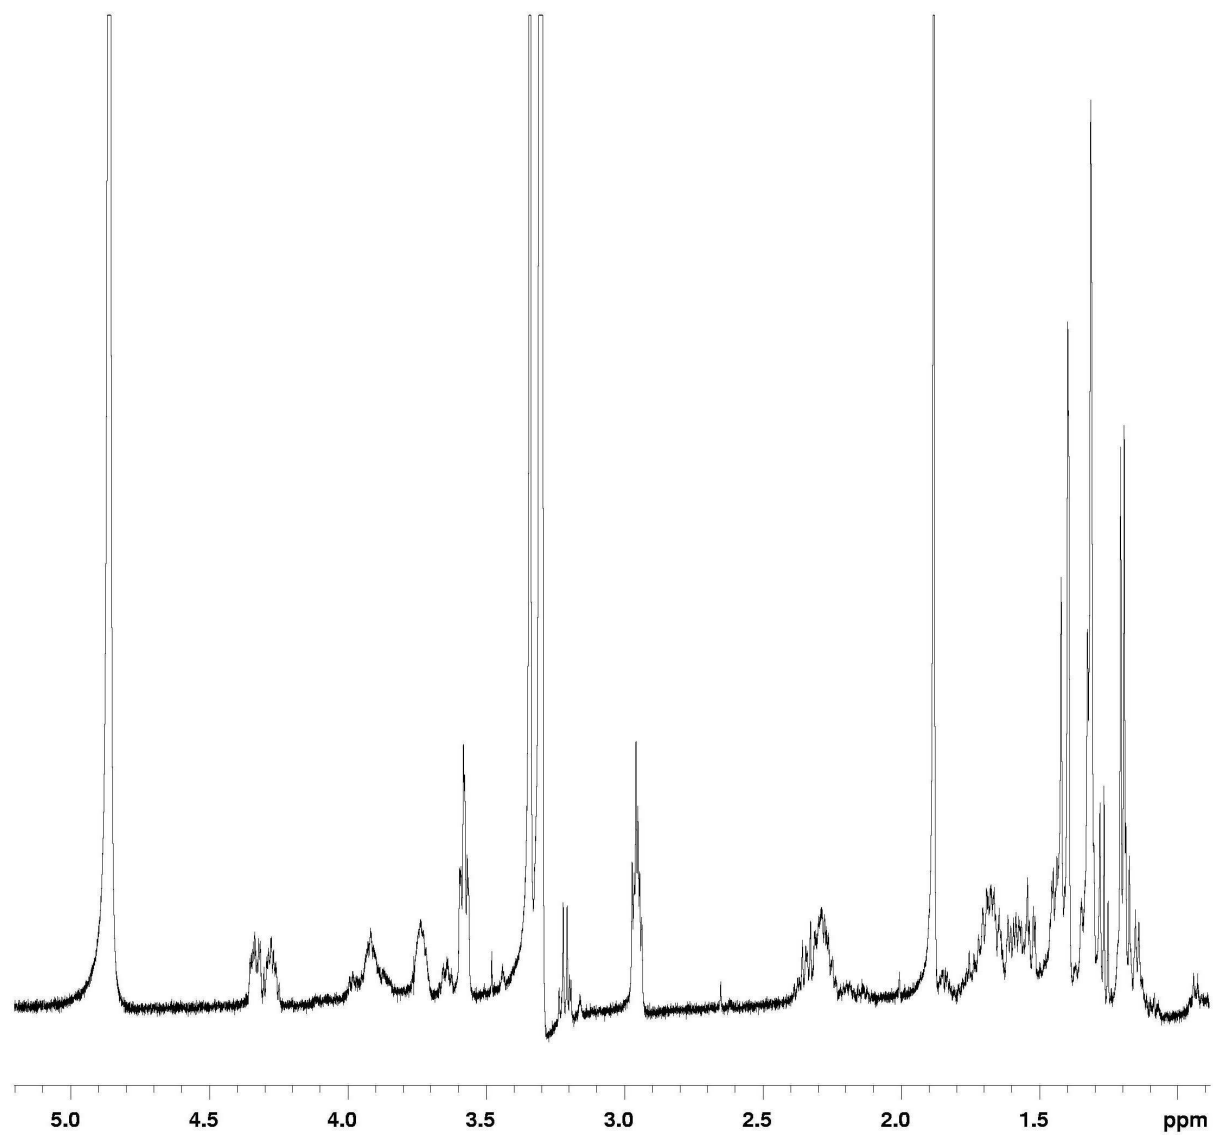

Figure S13. gHSQC NMR (500 MHz, CDCl<sub>3</sub>) of 12

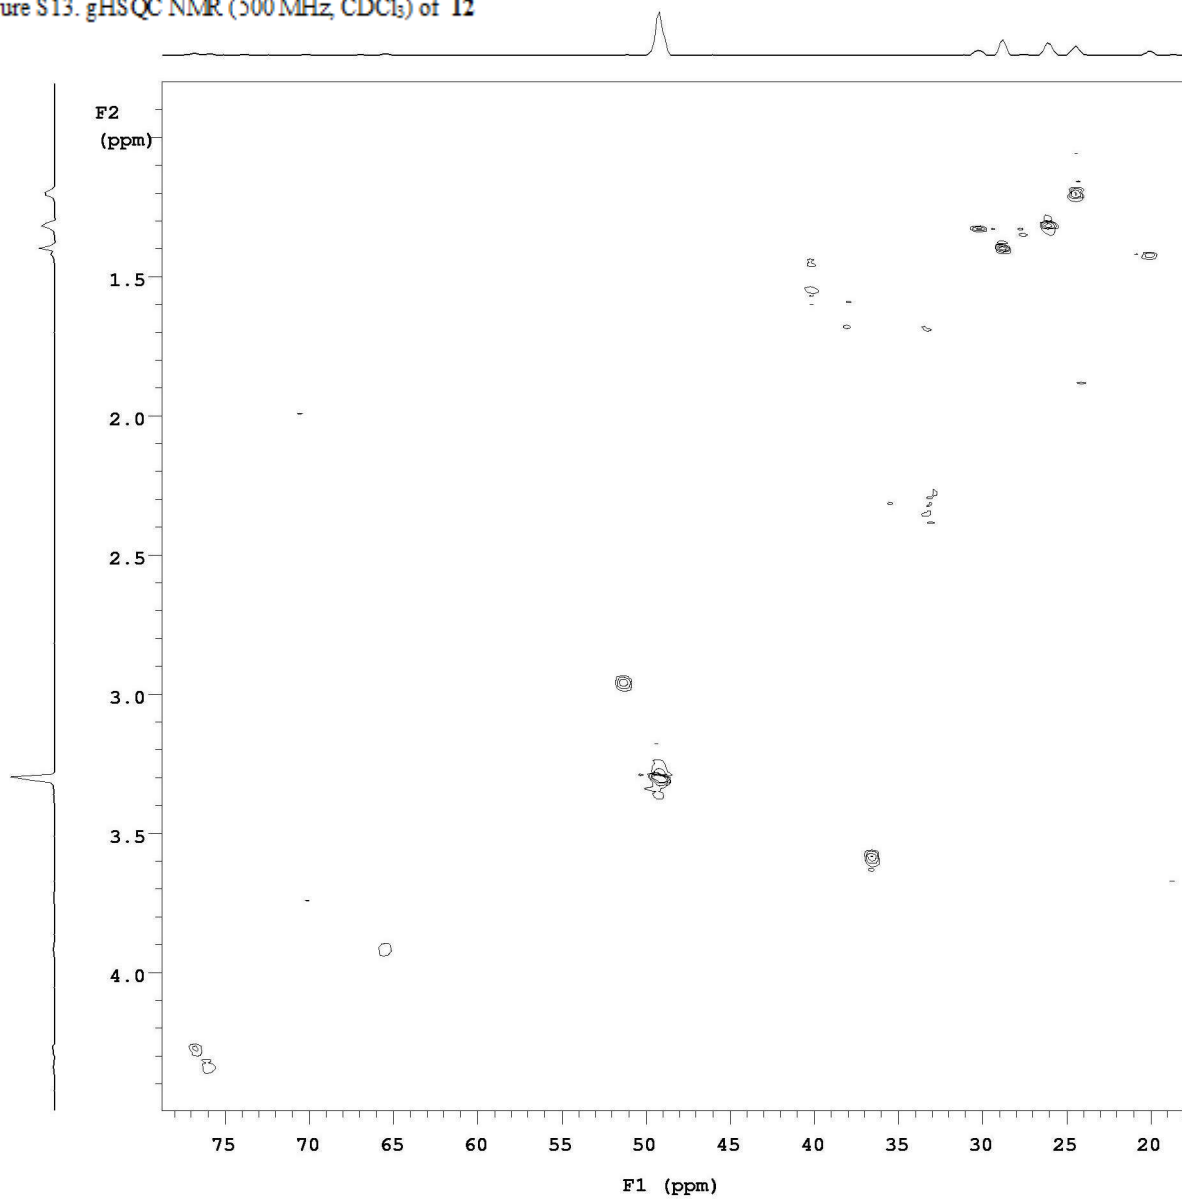

Figure S14. Dose response of carteriosulfonic acids A, B and C against GSK-3 $\beta$

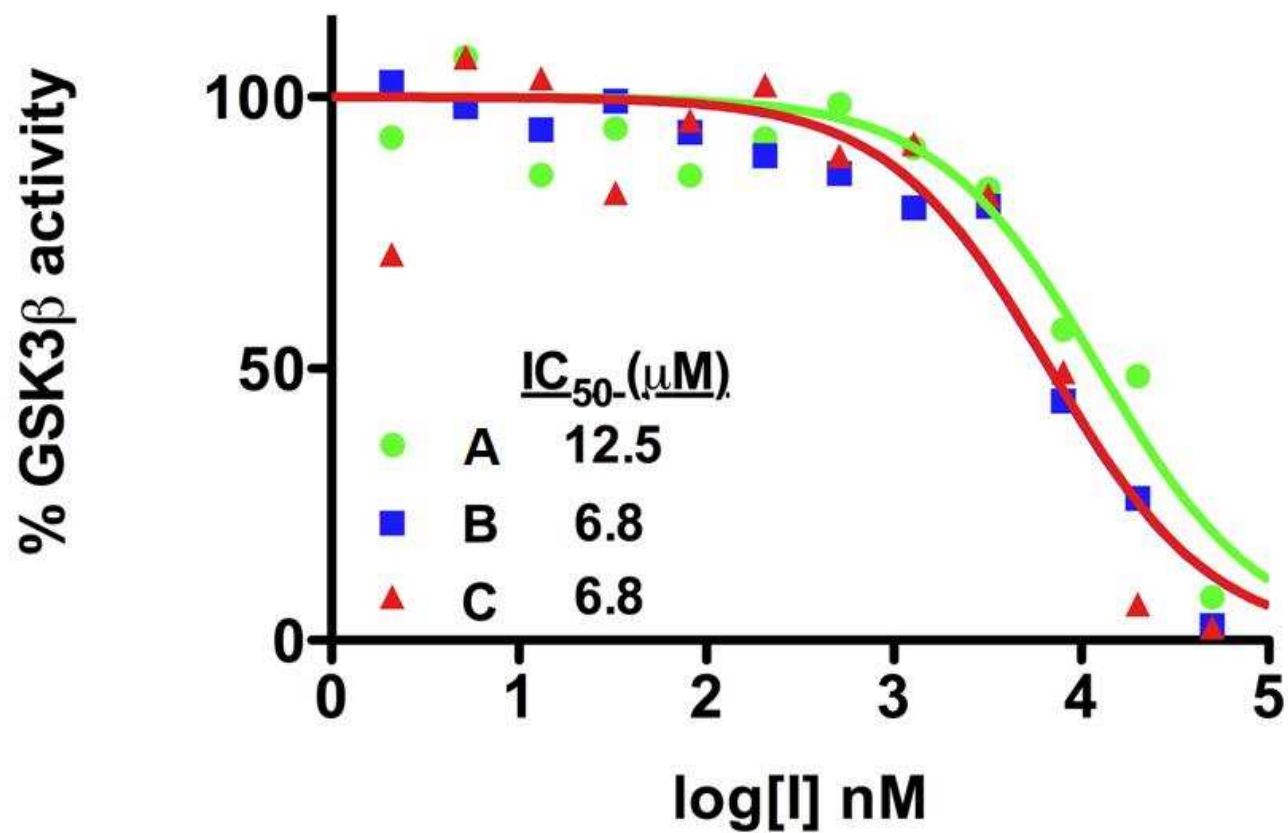

Supplement: NIHMS141140-supplement-1_si_001.pdf [file NIHMS141140-supplement-1_si_001.pdf]
